# Supplementary material for: A lipidomic based metabolic age score for monitoring the effects of lifestyle and diet on metabolic disease risk
Source: Research Square preprint supplement (doi:10.21203/rs.3.rs-9239578/v1), 2026-06-09
Supplement: Supplementary file 1 [file 7627e21951cc0b70b01c83cc.pdf]

**A.**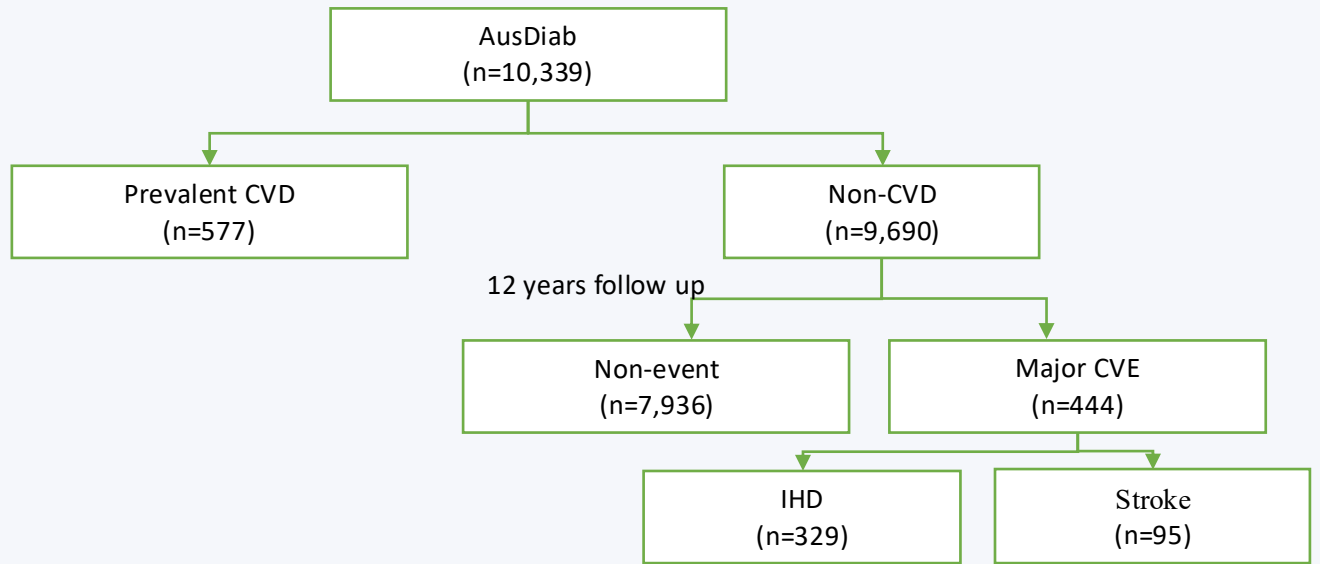**B.**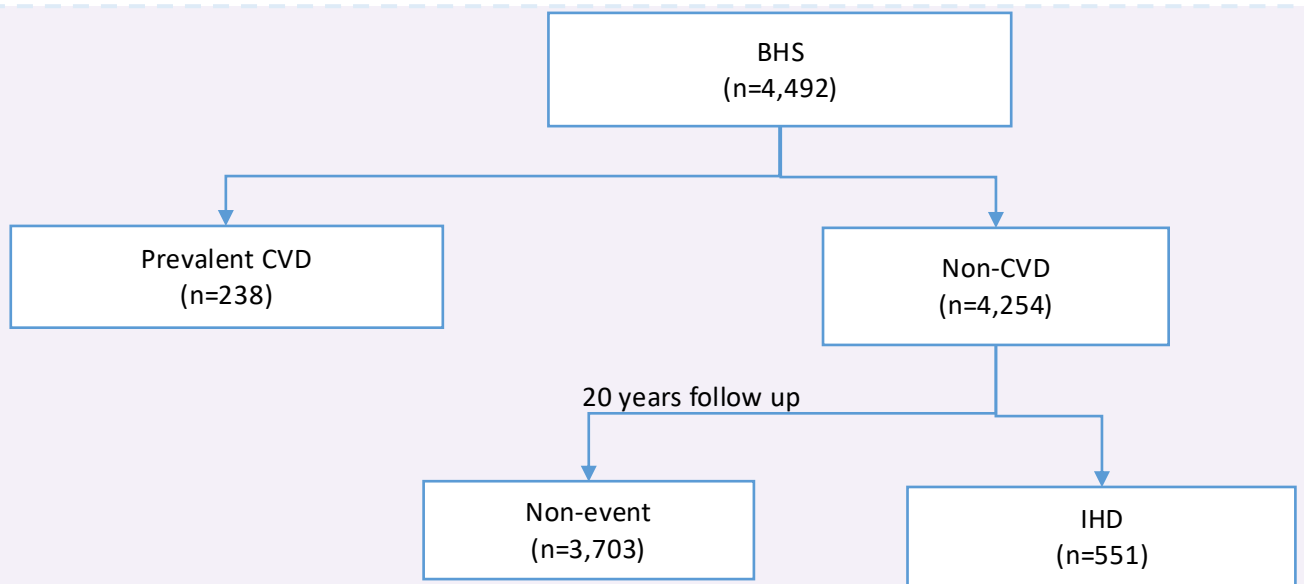**C.**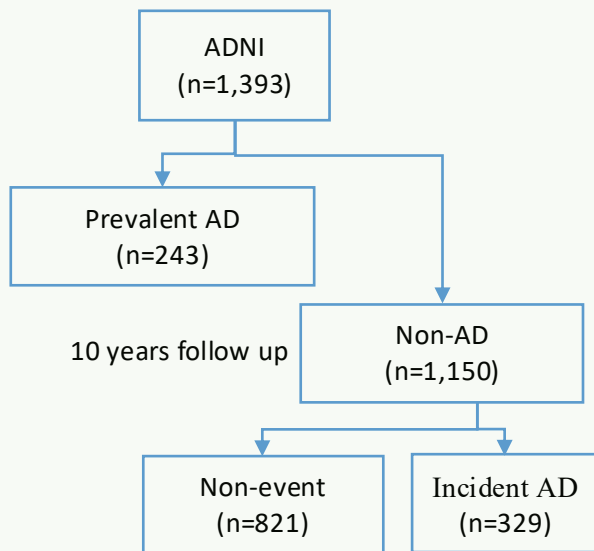**D.**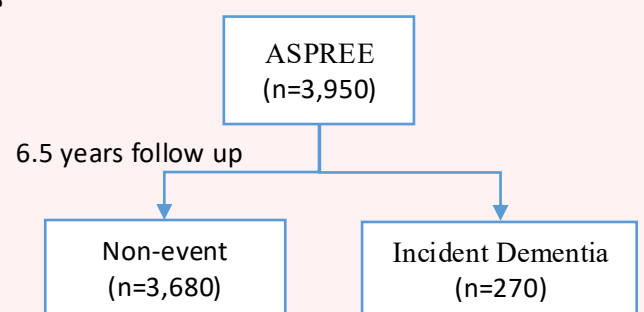

**Supplementary Figure 1. Details of clinical outcomes of the AusDiab (A), BHS (B), ADNI (C), and ASPREE (D) cohorts.**

## A. Training set (10 folds CV)

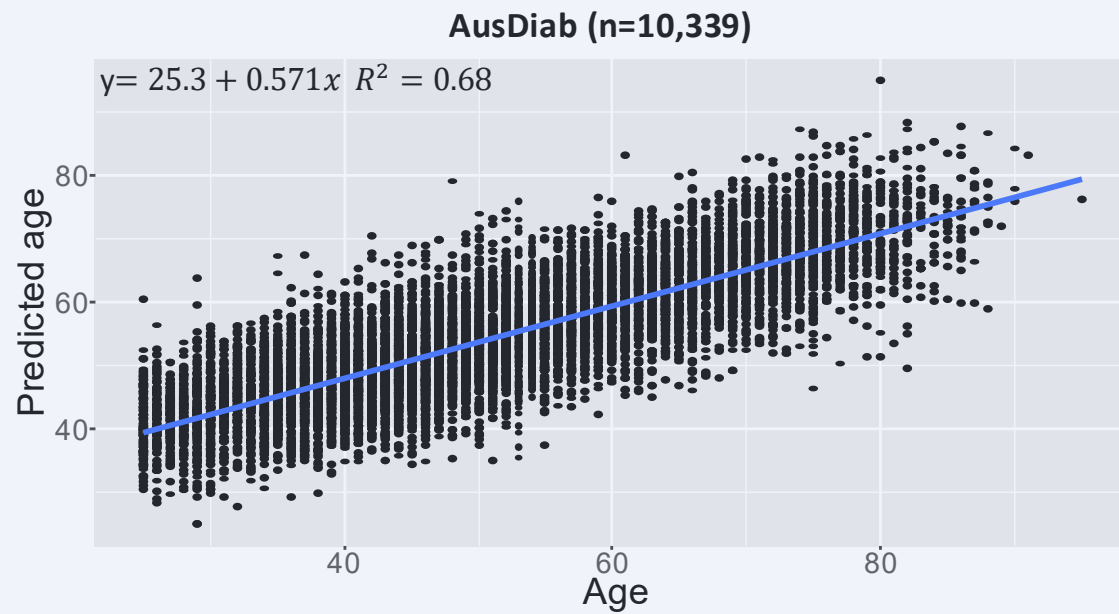

## B. External validation

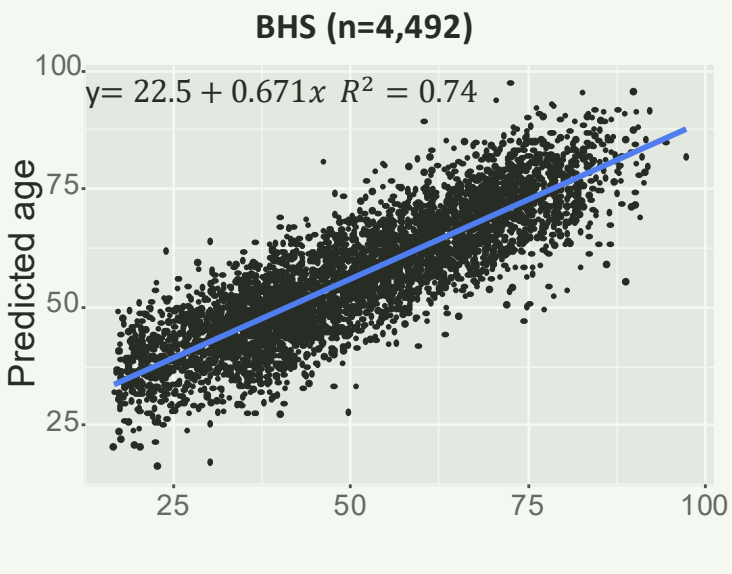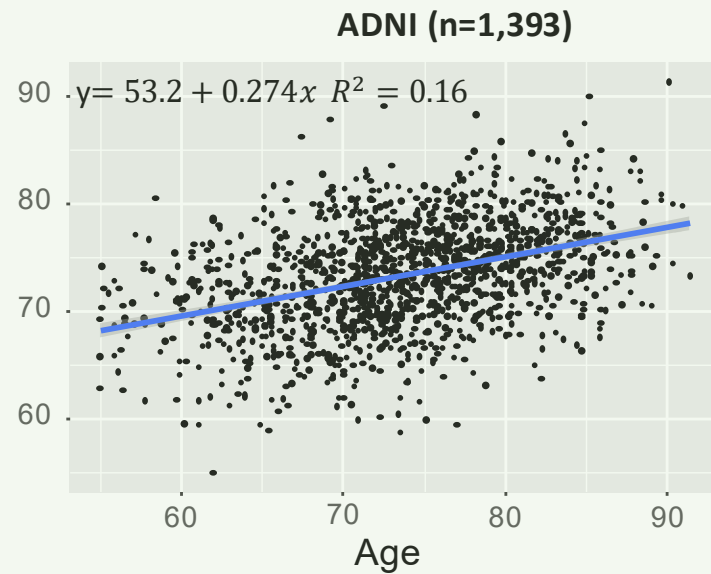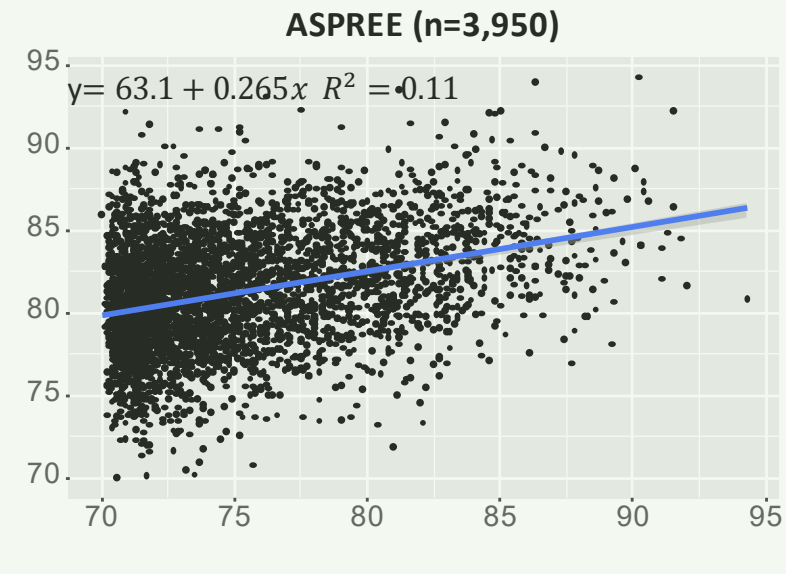

### Supplementary Figure 2. The prediction performance of metabolic age modelling (ridge) in AusDiab, BHS, ADNI, and ASPREE.

Ridge regression model was built on AusDiab (n=10,339) under 10 folds cross validation (A). Further, the model built on the full AusDiab data set was externally validated on BHS (n=4,492; B). Additionally, the model built on AusDiab (age $\geq$ 60; n=2,608) was validated on two elderly clinical populations - ADNI (N=1,393; C) and ASPREE (N=3,950; D).

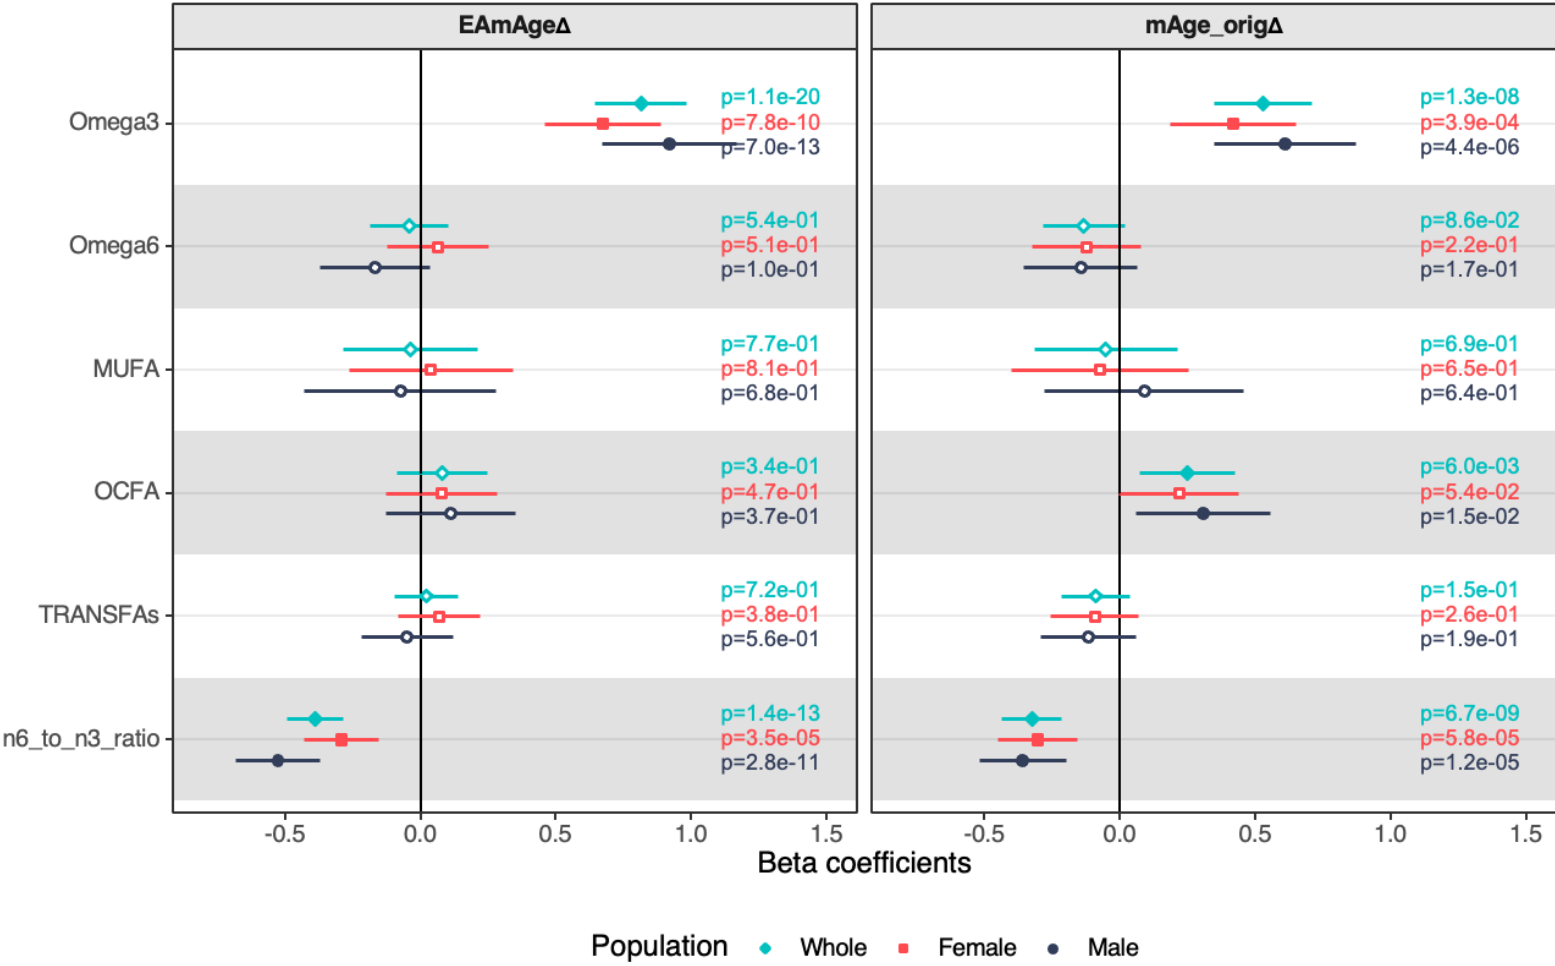

**Supplementary Figure 3. Associations of mAge\_orig $\Delta$  and EAmAge $\Delta$  with different combinations of dietary fatty acids.**

Separate linear regression model were carried out to examine different combinations of dietary fatty acids with two sets of mAge $\Delta$  with or without environmental adjustment.

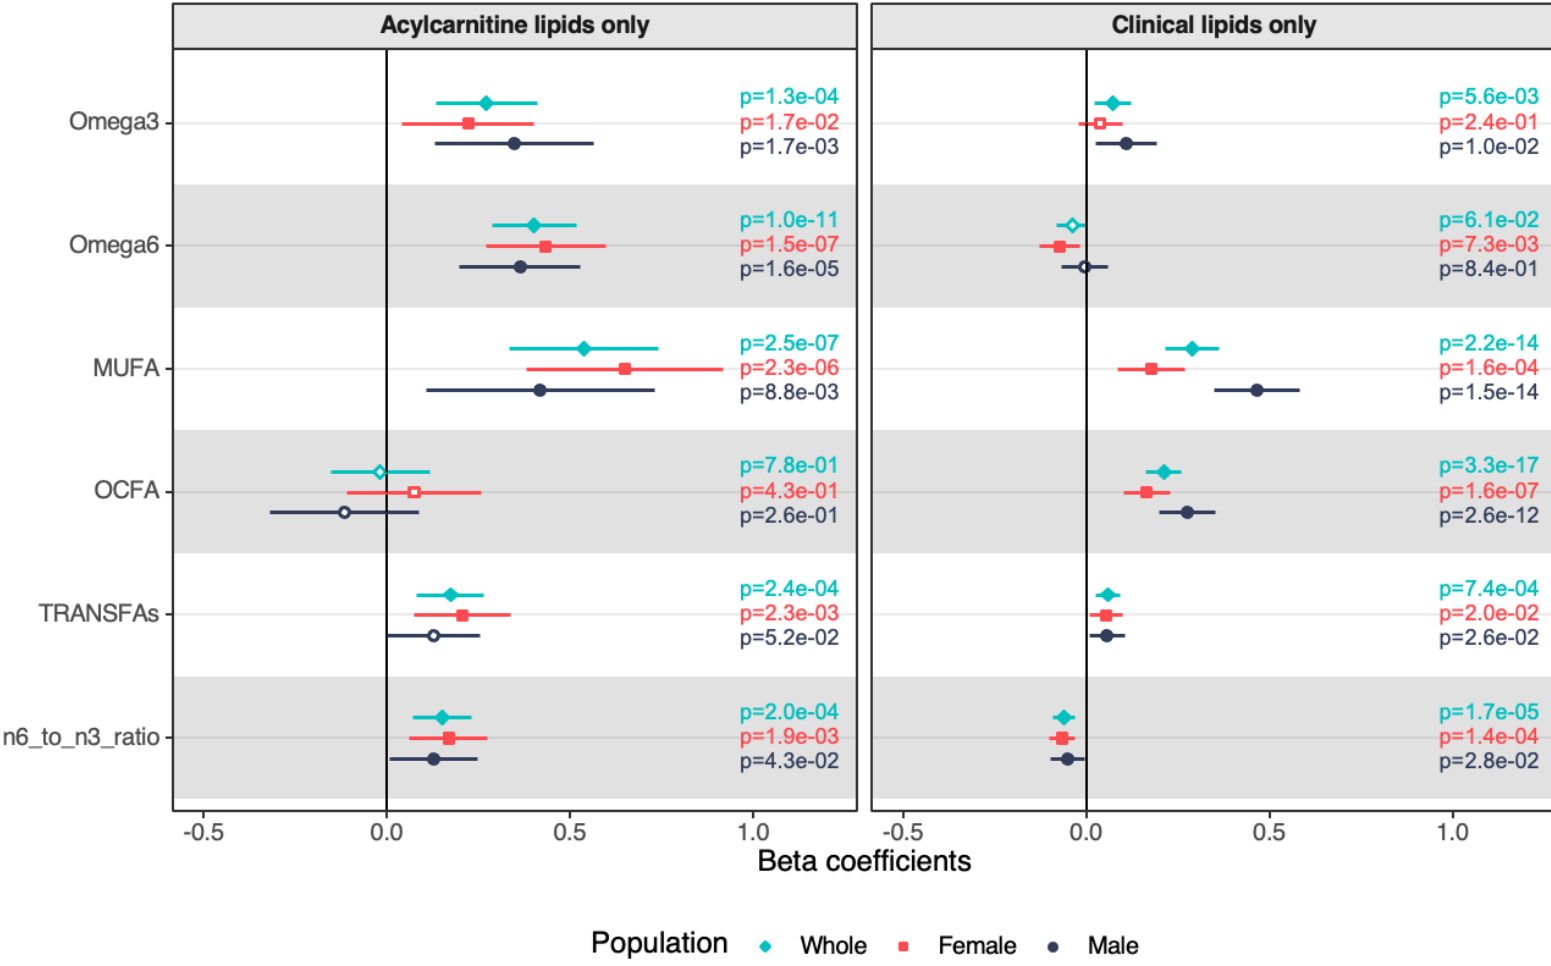

**Supplementary Figure 4. Associations of EAmAgeΔ with different combinations of dietary fatty acids.** EAmAge models were separately built on Acylcarnitine lipids only (left panel) and clinical lipid including HDL-C, TG, and TC (right panel).

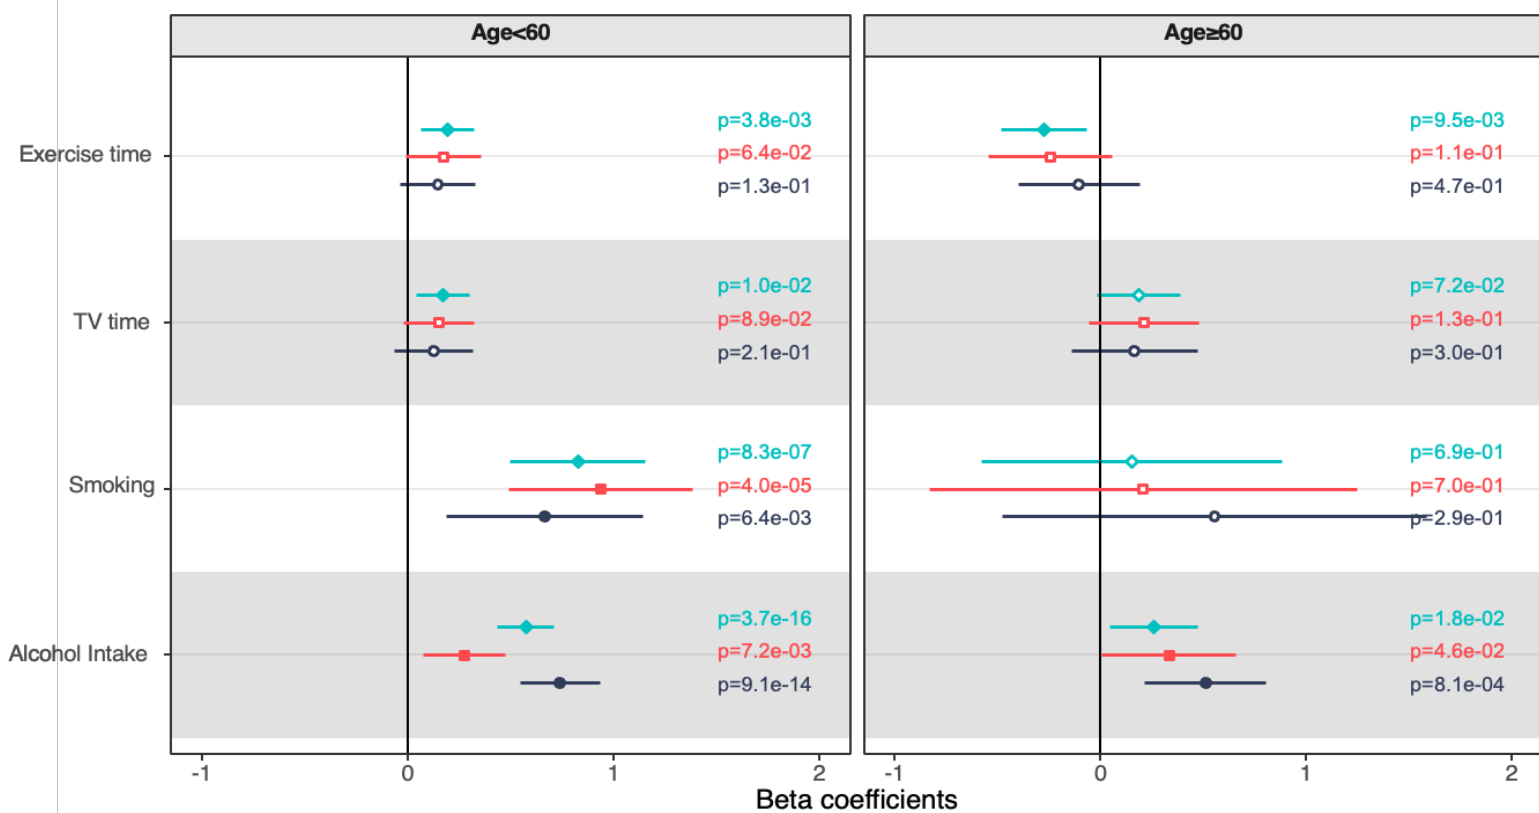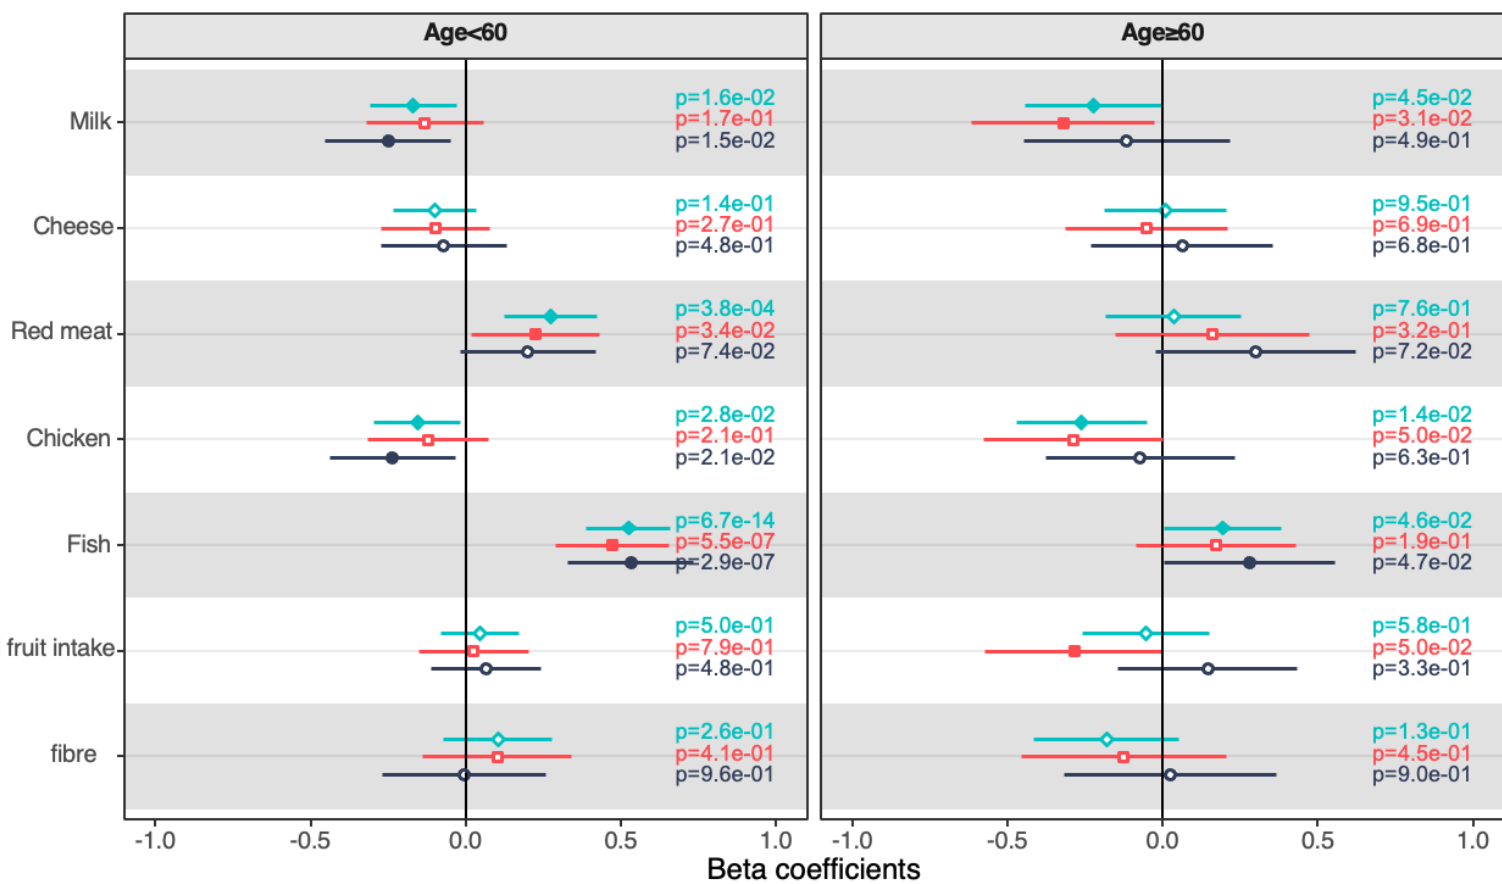

Population ◆ Whole ■ Female ● Male

**Supplementary Figure 5. Associations of EAmAgeΔ with environmental factors in the AusDiab cohort.**

Separate linear regression models were carried out to examine different environmental factors with EAmAgeΔ scores on the younger group (age < 60; Left panel) and older group (age ≥ 60; Right panel).

Smoking status (current smoker vs. non-smoker) was treated as a categorical variable. All other continuous environmental factors were inverse rank normalized and are interpreted per standard deviation change.

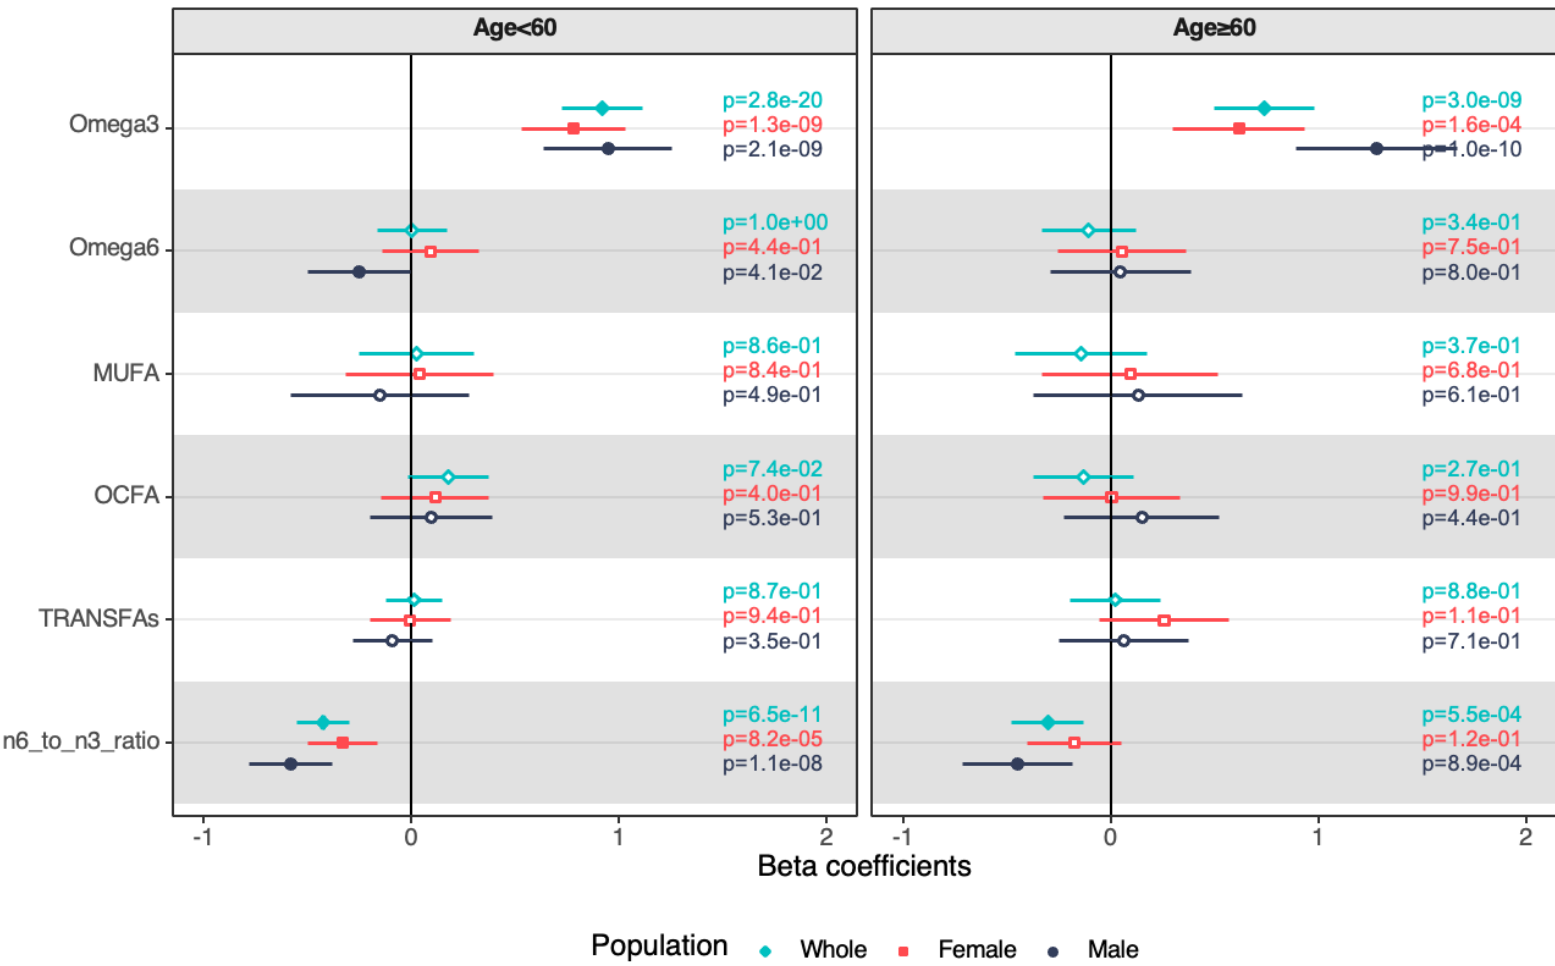

**Supplementary Figure 6. Associations of EAmAgeΔ with environmental factors in the AusDiab cohort.**

Separate linear regression model were carried out to examine different environmental factors with EAmAgeΔ scores on younger group (age < 60; Left panel) and older group (age ≥ 60; Right panel).
